# Supplementary material for: A regret-based three-way decision with novel intuitionistic fuzzy similarity in intuitionistic fuzzy information system
Source: Research Square preprint supplement (doi:10.21203/rs.3.rs-7799565/v1), 2025-11-12
Supplement: Supplementary file 1 [file 7258fa0c1663bf3be561c793.pdf]

## Change Lists

Scientific Reports

No. 3184fc3e-8d43-479c-b7a4-27d5b6ff8ba8

Title: A regret-based three-way decision with novel intuitionistic fuzzy similarity in intuitionistic fuzzy information system

We thank the editor for their valuable comments. We have revised the manuscript accordingly and hope that it is sufficiently improved to meet your standards.

**The following order is followed in preparing the response to the comments raised by the editor.**

- **First, the editor comments are mentioned in Black color.**
- **Then, our response follows in Bold and Italic fonts.**

### **Editor :**

1. We strongly encourage all authors to share their raw data, either by providing it in a supplementary file or depositing it in a public repository and providing the details on how to access it in this section. If you do not wish to share your data, please clearly state this in this section along with a justification. “Data availability” statements can take one of the following forms (or a combination of more than one if required for multiple data sets): The data sets generated and/or analysed during the current study are available in the [NAME] repository, [PERSISTENT WEB LINK TO DATA SETS]; The data sets used and/or analysed during the current study available from the corresponding author on reasonable request; All data generated or analysed during this study are included in this published article [and its supplementary information files]; The data sets generated and/or analysed during the current study are not publicly available due [REASON WHY DATA ARE NOT PUBLIC] but are available from the corresponding author on reasonable request; The data that support the findings of this study are available from [third party name] but restrictions apply to the availability of these data, which were used under license for the current study, and so are not publicly available. Data are however available from the authors upon reasonable request and with permission of [third party name]; No data sets were generated or analysed during the current study.

• ***We sincerely thank the editor for raising this question. In response to this suggestion, we have included a data description at the end of the article. The specific modifications are as follows:***

***The data sets used and/or analysed during the current study available from the corresponding author on reasonable request.***

***Please refer to the Data availability section on page 19 in the revised manuscript for details.***

2. We notice that figure 2 has not been referenced in the main text of your manuscript file. If figures are not cited in the manuscript they will not appear in the html (online)

version if your paper is accepted for publication. Therefore, it is essential they are mentioned at least once in the text and, we strongly recommend, in the order in which they are numbered.

- *We sincerely thank the editor for raising this question. In response to this suggestion, we have supplemented the citation for Figure 2. The specific modifications are as follows:*

*To enhance the interpretability of the method, we design Algorithm 1 and visually present its decision-making steps in the MADM problem through the 3WD flowchart shown in Figure 2.*

*For detailed information, please refer to the second to last paragraph on page 10 in the revised manuscript.*

3. We notice that table 5 has not been referenced in the main text of your manuscript file. If tables are not cited in the manuscript they will not appear in the html (online) version if your paper is accepted for publication. Therefore, it is essential they are mentioned at least once in the text and, we strongly recommend, in the order in which they are numbered.

- *We sincerely thank the editor for raising this question. In response to this suggestion, we have supplemented the citation for Table 5. The specific modifications are as follows:*

*Fifthly, we calculate the expected loss of each alternative based on Eqs.(26)-(28), and the calculation results are listed in Table 5.*

*Please refer to the first paragraph on page 13 in the revised manuscript for details.*
